# Supplementary material for: SARPPIC: Exploiting COVID-19 Contact Tracing Recommendation through Social Awareness
Source: PubMed Central journal article supplement (PMC7667519; doi:10.1155/2020/3460130), 2020-11-10
Supplement: 3460130.f1.pdf [file 3460130.f1.pdf]

## AUTHORS/RESEARCHERS:

Nana Yaw Asabere<sup>1</sup>, Amevi Acakpovi<sup>2</sup>, Emmanuel Kwaku Ofori<sup>3</sup>, Wisdom Torgby<sup>1</sup>, Marcellinus Kuuboore<sup>4</sup>, Gare Lawson<sup>1</sup> and Edward Adjaloko<sup>1</sup>

Department of Computer Science, Accra Technical University, Accra-Ghana<sup>1</sup>

Department of Electrical/Electronic Engineering, Accra Technical University, Accra-Ghana<sup>2</sup>

Department of Chemical Pathology, University of Ghana, Accra-Ghana<sup>3</sup>

Department of Information Technology Studies, University of Professional Studies, Accra-Ghana<sup>4</sup>

**Correspondence E-Mail:** [yawasbere2011@gmail.com](mailto:yawasbere2011@gmail.com); [yawasabere2005@yahoo.com](mailto:yawasabere2005@yahoo.com)

**RESEARCH ARTICLE:** SARPPIC: Exploiting COVID-19 Contact Tracing Recommendation Through Social Awareness

## DATASET: Graphical-Representation-of-the-Network-of-the-HEXACO-60-Items

We utilized and interconnected two real-world data sets namely: HEXACO-60 Dataset which is available in IEEE Data Port at: <http://dx.doi.org/10.21227/phht-pn81> and the ATU Dataset in SARVE-2 [1] available at [DOI: 10.1109/TETC.2018.2854718](https://doi.org/10.1109/TETC.2018.2854718).

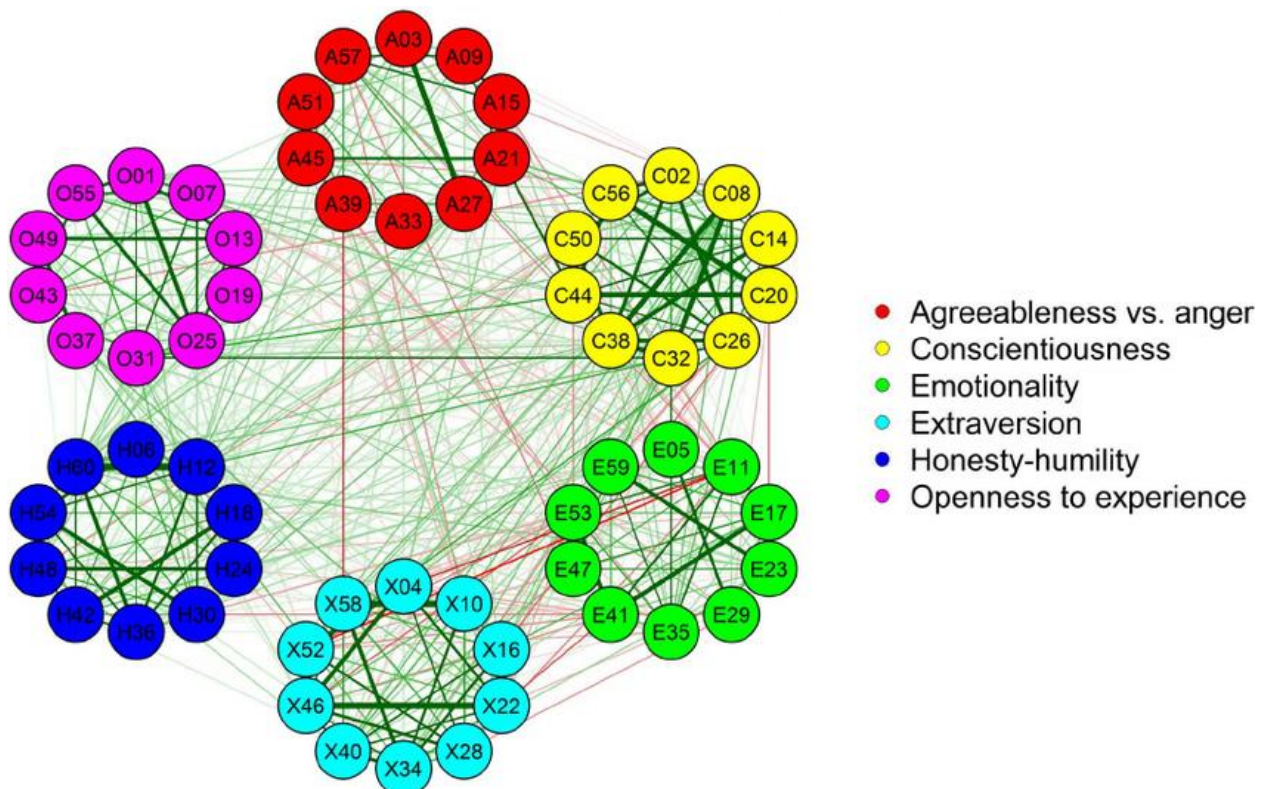

As shown above, the HEXACO-60 dataset contains 60 contact points and a total of 249 betweenness

centrality data. The contact points with the highest betweenness centrality initially required for experimentation in accordance to our *SARPPIC* algorithm are C02, C08 and C14 (26), C38, C32, and C26 (19), H06, H12 and H16 (31), and X40, X34 and X28 (23).

As stated in [1], data was gathered from students (contact points in *SARPPIC*) at Accra Technical University in Higher National Diploma (HND) Marketing ( $n=2864$ ), HND Computer Science ( $n=720$ ) and HND Building Technology ( $n=812$ ). Therefore, the ATU dataset utilized in this paper contains a total of 4396 users (2421 males representing 55.07% and 1975 females representing 44.93%). The present and past social ties of the ATU Data set are shown in the Tables below. Additionally, we have attached an excel file of all the data collected and how computations were done using appropriate formulas.

TABLE IV  
ATU DATASET- CONTACT DURATION TRENDS

| Past Social Tie Data |                     | Present Social Tie Data |                     |
|----------------------|---------------------|-------------------------|---------------------|
| Contact Duration     | Number of Attendees | Contact Duration        | Number of Attendees |
| 5                    | 126                 | 5                       | 129                 |
| 10                   | 370                 | 10                      | 438                 |
| 15                   | 165                 | 15                      | 154                 |
| 20                   | 405                 | 20                      | 420                 |
| 25                   | 299                 | 25                      | 244                 |
| 30                   | 471                 | 30                      | 432                 |
| 35                   | 229                 | 35                      | 223                 |
| 40                   | 301                 | 40                      | 298                 |
| 45                   | 124                 | 45                      | 119                 |
| 50                   | 254                 | 50                      | 239                 |
| 55                   | 61                  | 55                      | 62                  |
| 60                   | 181                 | 60                      | 182                 |
| 65                   | 145                 | 65                      | 161                 |
| 70                   | 104                 | 70                      | 104                 |
| 75                   | 1                   | 75                      | 1                   |
| 80                   | 61                  | 80                      | 61                  |

TABLE I  
 ATU DATASET- CONTACT FREQUENCY TRENDS

| Past Tie Strength Data |                          | Present Tie Strength Data |                          |
|------------------------|--------------------------|---------------------------|--------------------------|
| Contact Frequency      | Number of Contact Points | Contact Frequency         | Number of Contact Points |
| 1                      | 263                      | 1                         | 438                      |
| 2                      | 1246                     | 2                         | 1127                     |
| 3                      | 669                      | 3                         | 805                      |
| 4                      | 477                      | 4                         | 485                      |
| 5                      | 291                      | 5                         | 245                      |
| 6                      | 243                      | 6                         | 134                      |
| 7                      | 108                      | 7                         | 63                       |

## REFERENCE

1. N. Y. Asabere, B. Xu, A. Acakpovi, and N. Deonauth, "SARVE-2: exploiting social venue recommendation in the context of smart conferences," *IEEE Transactions on Emerging Topics in Computing*, 2018. [DOI: 10.1109/TETC.2018.2854718](https://doi.org/10.1109/TETC.2018.2854718)
